# Supplementary material
Source: publisher figshare collection journal article supplement (https://diabetesjournals.figshare.com/ndownloader/files/34086599)
Supplement: Supplementary file 1 [file 34086599]

## Sheet: Sheet1
Target	Clone	Supplier
CD4	GK1.5	Biolegend
CD8a	53-6.7	Biolegend
CD3e	145-2C11	Biolegend
	17A2	Biolegend
CD5	53-7.3	Biolegend
CD69	H1.2F3	Biolegend
		BD Biosciences
CD25	PC61	BD Biosciences
		Biolegend
CD11a	M17/4	BD Biosciences
Lag3	C9B7W	BD Biosciences
Foxp3	FJK-16s	eBioscience
	MF-14	Biolegend
PD1	29F.1A12	Biolegend
CD11c	N418	Biolegend
CD73	TY/11.8	Biolegend
CD11b	M1/70	Biolegend
IFNg	XMG1.2	Biolegend
FR4	12A5	Biolegend
CD62L	MEL-14	Biolegend
H-2Kb/H-2Db	28-8-6	Biolegend
CD44	IM7	eBioscience
		BIolegend
Cleaved caspase-3	D3E9	Cell Signaling Technology
HLA-DR	L243	Biolegend
B220	RA3-6B2	Biolegend
Sca-1	D7	eBioscience
c-kit	ACK2	eBioscience
Zombie red		Thermo Fisher
CFSE		eBioscience
